# Supplementary material for: Insulin Degludec Versus Insulin Glargine in Type 1 and Type 2 Diabetes Mellitus: A Meta-Analysis of Endpoints in Phase 3a Trials
Source: Springer Nature journal article supplement (doi:10.1007/s13300-014-0076-9), 2014-07-31
Supplement: MOESM1 [file 9263252]

- Patient-level meta-analyses of six trials were performed to obtain a comprehensive overview of differences between insulin degludec and insulin glargine.
- The analyses covered trials in patients with basal-bolus-treated type 1 diabetes mellitus (T1DM<sub>B/B</sub>; n=958), insulin-naïve type 2 diabetes mellitus (T2DM<sub>insulin-naïve</sub>; n=1922), and basal-bolus-treated T2DM (T2DM<sub>B/B</sub>; n=992).
- Compared with glargine, degludec was associated with equivalent glycosylated hemoglobin (HbA<sub>1c</sub>) control in all populations; greater reductions in fasting plasma glucose (FPG) in T1DM<sub>B/B</sub> and T2DM<sub>insulin-naïve</sub>; lower total daily insulin doses in T1DM<sub>B/B</sub> and T2DM<sub>insulin-naïve</sub>; and significantly lower nocturnal hypoglycemia rates in all populations.
- The efficacious lowering of FPG values together with lower rates of nocturnal hypoglycemia with degludec is a novel finding that could help encourage more rigorous titration of insulin to achieve target glucose levels.

This summary slide represents the opinions of the authors. Sponsorship for this study was funded by Novo Nordisk A/S. Medical writing assistance for this study was provided by Grace Townshend, MSc, and Daria Renshaw of Watermeadow Medical and funded by Novo Nordisk. For a full list of acknowledgments and conflicts of interest for all authors of this article, please see the full text online. Copyright © The Authors 2014. Creative Commons Attribution Noncommercial License (CC BY-NC).
